# Supplementary material
Source: PubMed Central journal article supplement (PMC3359772)
Supplement: am300438k_si_001.pdf [file am300438k_si_001.pdf]

## **Supporting Information:**

# Crucial Differences in the Hydrolytic Degradation between Industrial Polylactide and Laboratory- scale Poly(L-lactide)

*Anders Höglund, Karin Odelius, and Ann-Christine Albertsson\**

Department of Fibre and Polymer Technology, KTH Royal Institute of Technology, SE-100  
44, Stockholm, Sweden

\*Corresponding author: [aila@polymer.kth.se](mailto:aila@polymer.kth.se)

Tel. +46-8-790 82 74 Fax: +46-8-20 84 77

## Degradation Environment

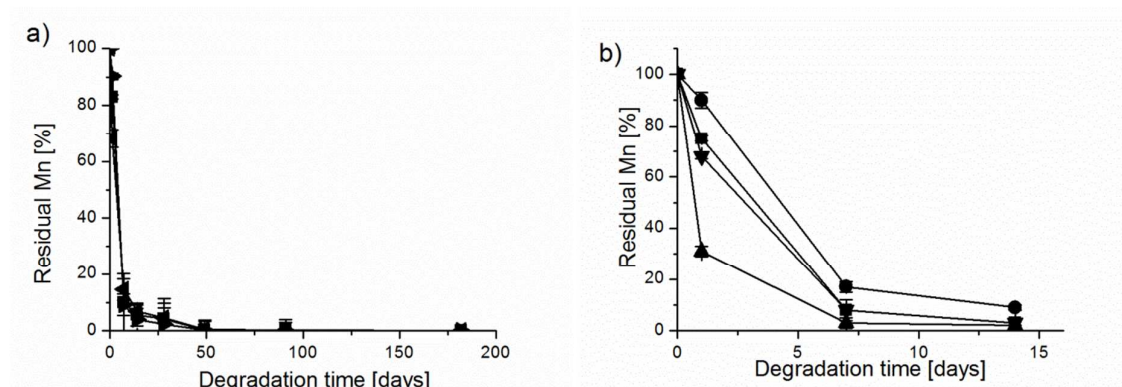

**Figure S1** Residual molar mass during **a)** long-term degradation and **b)** short-term hydrolysis of polylactide 3051D in (■) H<sub>2</sub>O at 60 °C (●) PBS at 60 °C, (▲) PBS at 80 °C, and (▼) pH 5 buffer at 60 °C.

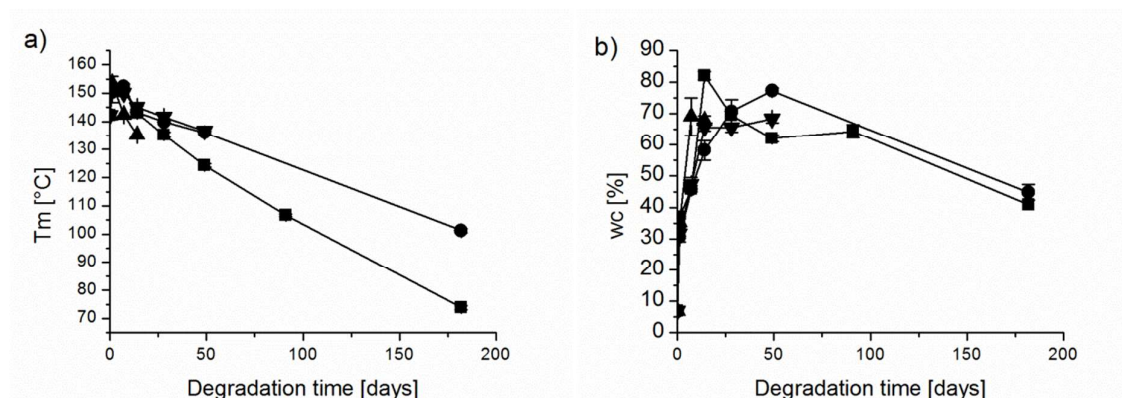

**Figure S2a)** Melting temperature and **b)** degree of crystallinity as a function of degradation time for polylactide 3051D degraded in (■) H<sub>2</sub>O at 60 °C (●) PBS at 60 °C, (▲) PBS at 80 °C, and (▼) pH 5 buffer at 60 °C.

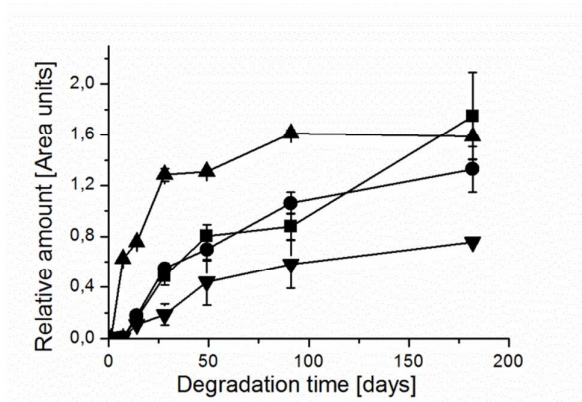

**Figure S3** Relative amount of lactic acid monomer extracted from the aqueous fractions of polylactide 3051D samples degraded in (■) H<sub>2</sub>O at 60 °C (●) PBS at 60 °C, (▲) PBS at 80 °C, and (▼) pH 5 buffer at 60 °C.

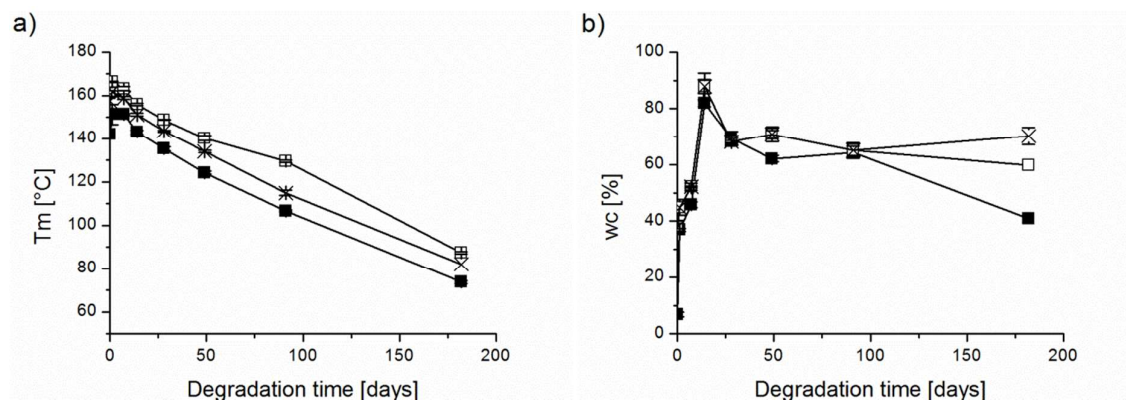

**Figure S4** Melting temperature and **b)** degree of crystallinity as a function of degradation time during hydrolysis of (■) poly(lactide 3051D), (□) poly(lactide 3001D), and (×) 50:50 blend of poly(lactide 3051D and 3001D in H<sub>2</sub>O at 60 °C.

## PLA Grade

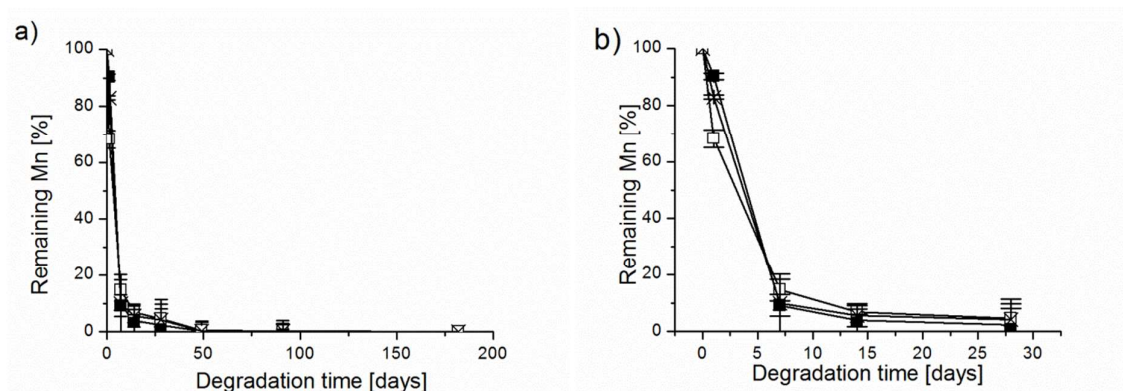

**Figure S5** Remaining molar mass during **a)** long-term degradation and **b)** short-term hydrolysis of (■) poly lactide 3051D, (□) poly lactide 3001D, and (×) 50:50 blend of poly lactide 3051D and 3001D in H<sub>2</sub>O at 60 °C.

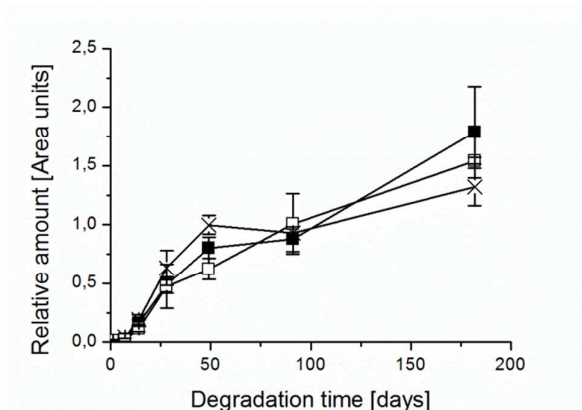

**Figure S6** Relative amount of extracted lactic acid monomer extracted from the water fractions of (■) poly lactide 3051D, (□) poly lactide 3001D, and (×) 50:50 blend of poly lactide 3051D and 3001D in H<sub>2</sub>O at 60 °C.
